# Supplementary material
Source: PubMed Central journal article supplement (PMC7655723)
Supplement: NIHMS1618911-supplement-4.pdf [file NIHMS1618911-supplement-4.pdf]

## Supplemental Information

### Next generation surrogate Wnts support organoid growth and deconvolute Frizzled pleiotropy *in vivo*

**Authors:** Yi Miao<sup>1</sup>, Andrew Ha<sup>2,3</sup>, Wim de Lau<sup>4</sup>, Kanako Yuki<sup>2</sup>, António J. M. Santos<sup>2</sup>, Changjiang You<sup>5</sup>, Maarten Geurts<sup>4</sup>, Jens Puschhof<sup>4</sup>, Cayetano Pleguezuelos-Manzano<sup>4</sup>, Weng Chuan Peng<sup>6</sup>, Ramazan Senlice<sup>7</sup>, Carol Piani<sup>7</sup>, Jan W. Buikema<sup>8</sup>, Oghenekeewe M. Gbenedio<sup>9</sup>, Mario Vallon<sup>2</sup>, Jenny Yuan<sup>2</sup>, Sanne de Haan<sup>10</sup>, Wieger Hemrika<sup>11</sup>, Kathrin Rösch<sup>12</sup>, Luke T. Dang<sup>13</sup>, David Baker<sup>13</sup>, Melanie Ott<sup>12</sup>, Philippe Depeille<sup>8</sup>, Sean M. Wu<sup>14</sup>, Jarno Drost<sup>10</sup>, Roeland Nusse<sup>6</sup>, Jeroen P. Roose<sup>9</sup>, Jacob Piehler<sup>5</sup>, Sylvia F. Boj<sup>7</sup>, Claudia Y. Janda<sup>15</sup>, Hans Clevers<sup>4,10</sup>, Calvin J. Kuo<sup>2</sup>, K. Christopher Garcia<sup>1,16\*</sup>

#### Affiliations:

<sup>1</sup>Department of Molecular and Cellular Physiology, Department of Structural Biology, Howard Hughes Medical Institute, Stanford University School of Medicine, Stanford, California 94305, USA

<sup>2</sup>Department of Medicine, Division of Hematology, Stanford University School of Medicine, Stanford, California 94305, USA

<sup>3</sup>Department of Biology, Stanford University School of Medicine, Stanford, California 94305, USA

<sup>4</sup>Oncode Institute, Hubrecht Institute, University Medical Centre Utrecht, Utrecht, the Netherlands.

<sup>5</sup>Division of Biophysics, Department of Biology, University of Osnabrück, 49076 Osnabrück, Germany

<sup>6</sup>Howard Hughes Medical Institute, Department of Developmental Biology, Institute for Stem Cell Biology and Regenerative Medicine, Stanford University School of Medicine, Stanford, CA 94305, USA

<sup>7</sup>Foundation Hubrecht Organoid Technology (HUB), Utrecht, the Netherlands.

<sup>8</sup>Department of Cardiology, University Medical Center Utrecht & Utrecht Regenerative Medicine Center, Utrecht University, 3508 GA Utrecht, the Netherlands

<sup>9</sup>Department of Anatomy, University of California, San Francisco, San Francisco, California, USA.

<sup>10</sup>Oncode Institute, Princess Máxima Center for pediatric oncology, Heidelberglaan 25, 3584 CS Utrecht, the Netherlands

<sup>11</sup>U-Protein Express BV, Yalelaan 62, Utrecht 3584CM, the Netherlands.

<sup>12</sup>Gladstone Institutes and Department of Medicine, University of California, San Francisco, San Francisco, California, USA

<sup>13</sup>Department of Biochemistry, Institute for Protein Design and Howard Hughes Medical Institute, University of Washington, Seattle, WA 98105, USA

<sup>14</sup>Division of Cardiovascular Medicine, Department of Medicine; Cardiovascular Institute and Institute of Stem Cell Biology and Regenerative Medicine, Stanford University School of Medicine, Stanford, California, 94305, USA

<sup>15</sup>Princess Máxima Center for Pediatric Oncology, Utrecht, The Netherlands

<sup>16</sup>Lead contact

\*Correspondence: [kcgarcia@stanford.edu](mailto:kcgarcia@stanford.edu)

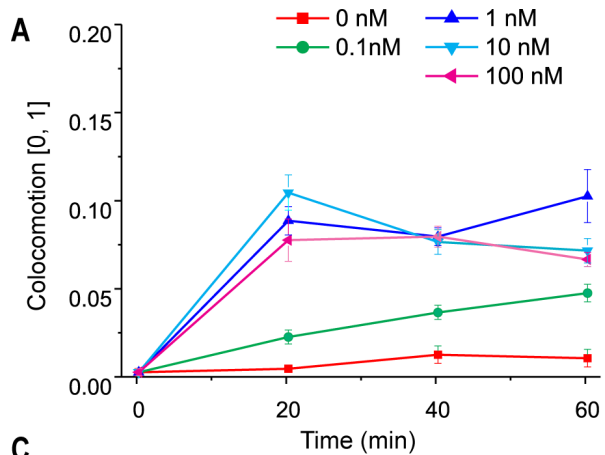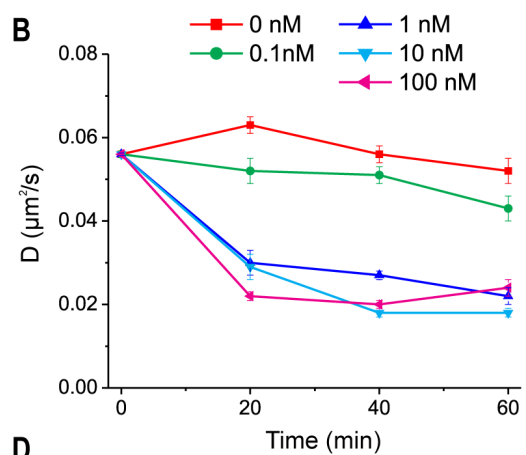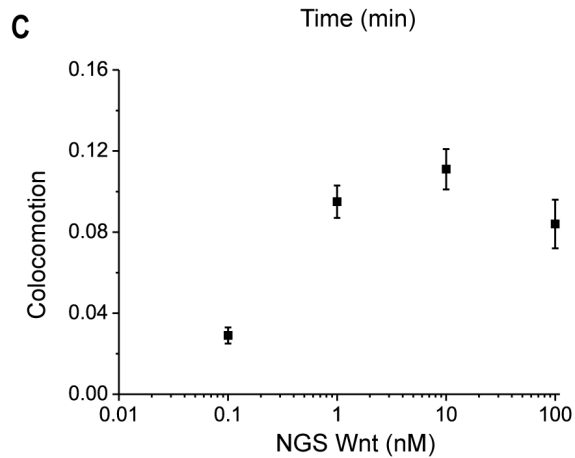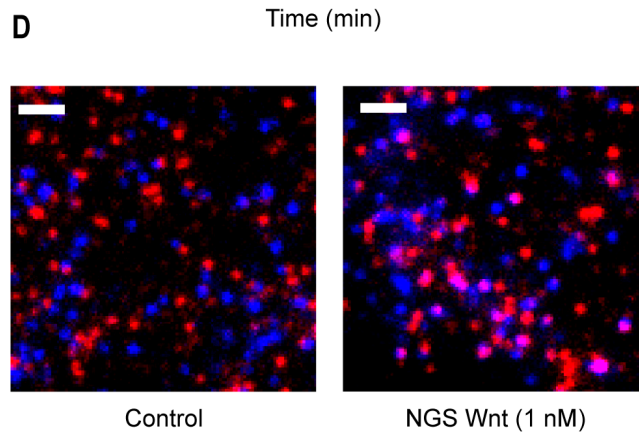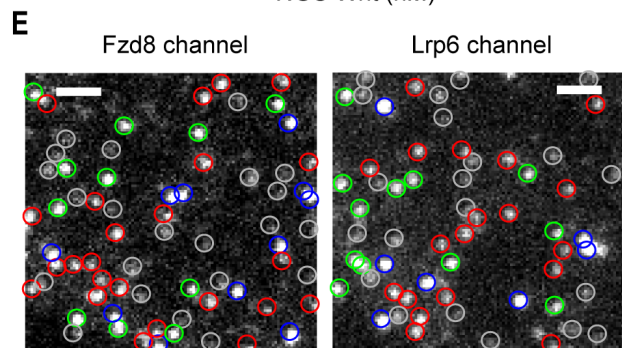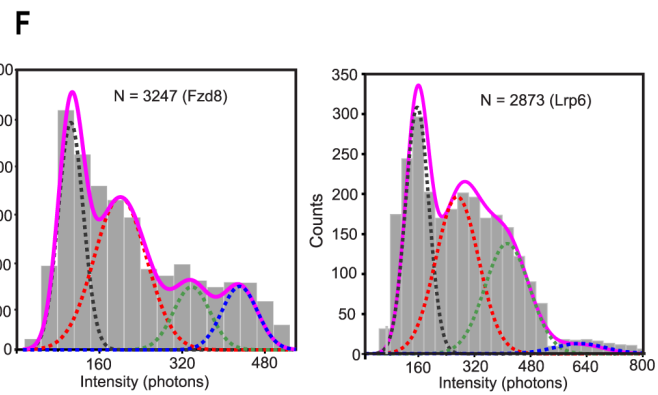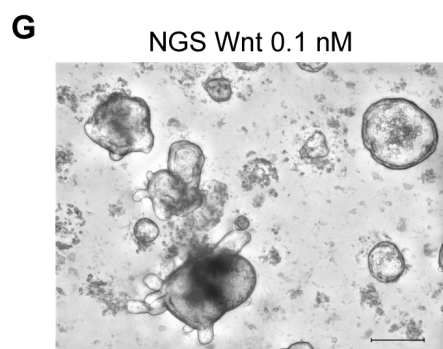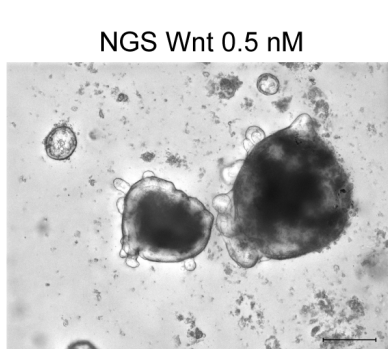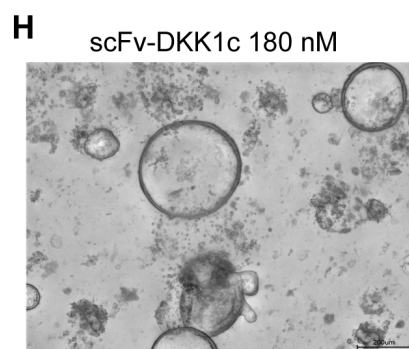

**Figure S1. Time-lapse measurement of co-locomotion and quantification of Lrp6 and Fzd8 using single molecule imaging analysis. (Related to Figure 1)**

(A) Time-lapse measurement of co-locomoting Lrp6 and Fzd8 using 0 nM, 0.1 nM, 1 nM, 10 nM and 100 nM of Fzd7/8 subtype NGS Wnt. Error bars in represent S.E. of measurements from  $n > 12$  individual cells for each condition.

(B) Average diffusion constant of Fzd8 as function of time after treating with 0 nM, 0.1 nM, 1 nM, 10 nM and 100 nM of Fzd7/8 subtype NGS Wnt. Error bars in represent S.E. of measurements from  $n > 12$  individual cells for each condition.

(C) Co-locomotion of Lrp6 and Fzd8 as function of Fzd7/8 subtype NGS Wnt concentrations after 20 min stimulation. Error bars represent S.E. of measurements from  $n > 12$  individual cells for each condition.

(D) Representative raw images without treatment (control) and after treatment with 1 nM Fzd7/8 subtype NGS Wnt. Fzd8: blue. Lrp6: red. Scale bars represents 2  $\mu\text{m}$ .

(E) Representative raw images of Fzd8 and Lrp6 after treatment with 1 nM Fzd7/8 subtype NGS Wnt. On the basis of their intensities, individual diffraction-limited spots in the raw images were classified as monomers (gray circle), dimers (red circle), trimers (green circle) and higher oligomers (blue circle), respectively. Scale bars represents 2  $\mu\text{m}$ .

(F) Quantification of oligomer fractions by multicomponent Gaussian fitting of single molecule intensity histogram. More than 2800 individual complex intensities were examined in the pooled analyses for each receptors.

(G) Representative brightfield images of mouse colon organoids cultured with 0.1 nM and 0.5 nM Fzd7/8 subtype NGS Wnt. Scale bar represents 200  $\mu\text{m}$ .

(H) Representative brightfield images of mouse colon organoids cultured with 180 nM Wnt surrogate scFv-DKK1c. Scale bar represents 200  $\mu\text{m}$ .



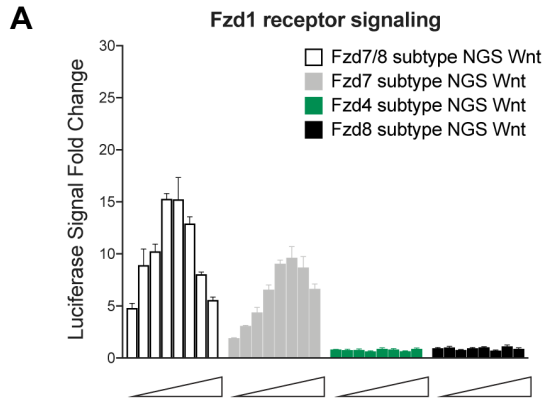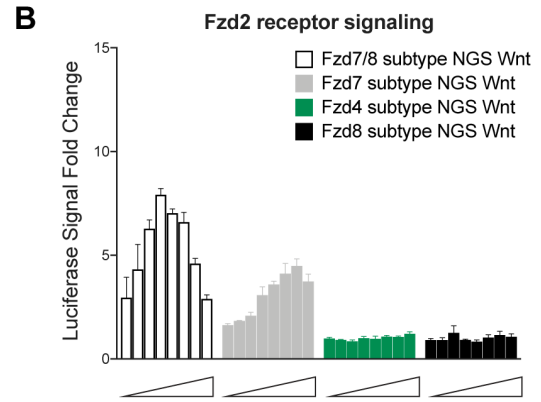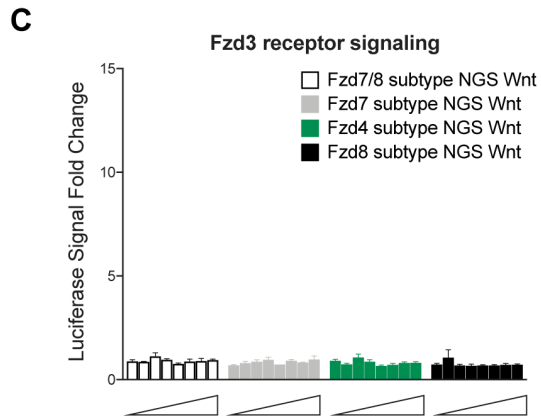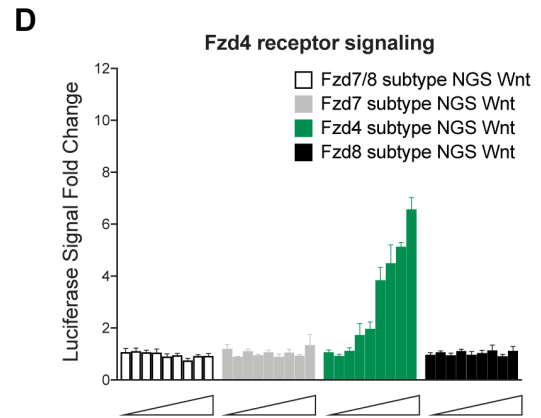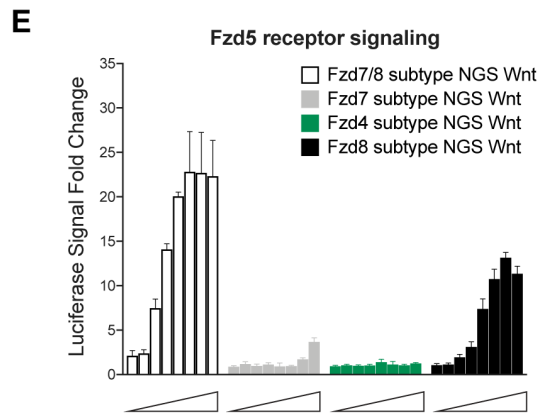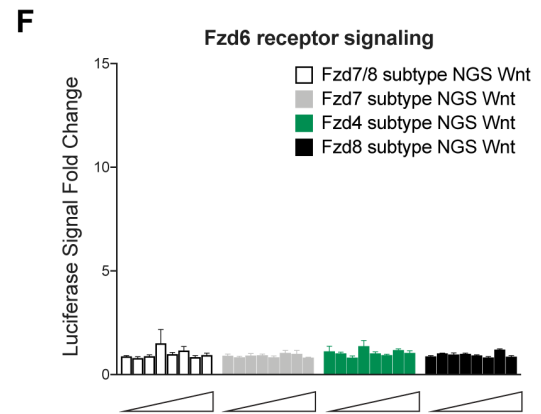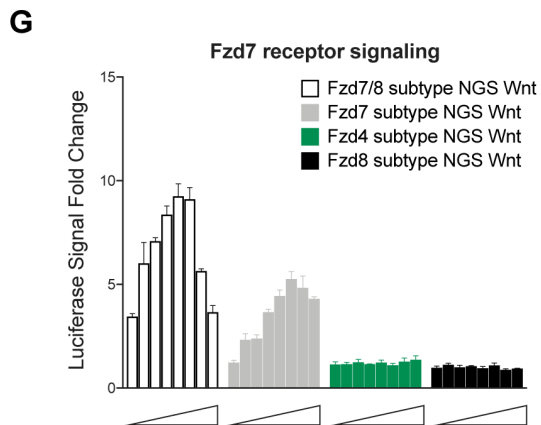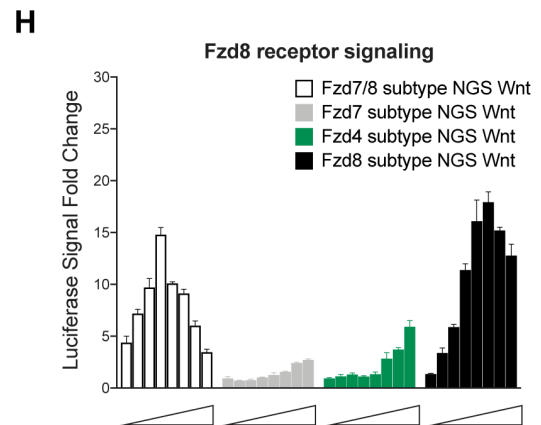

**Figure S2. Fzd subtype NGS Wnts activates canonical  $\beta$ -catenin signaling in a Frizzled-selective manner. (Related to Figure 1)**

Wnt luciferase reporter assays in HEK 293T Fzd KO cell line transfected with individual Fzd receptors. Fzd receptor knockout cells were treated with indicated NGS Wnts. Luminance signal fold change was normalized to control. All NGS Wnts were added at concentrations from 78 pM to 10 nM (expect 78 pM to 20 nM in Fzd4-transfected cells). Data represents mean  $\pm$  S.E., N = 3 technical replicates. Experiments were performed twice.

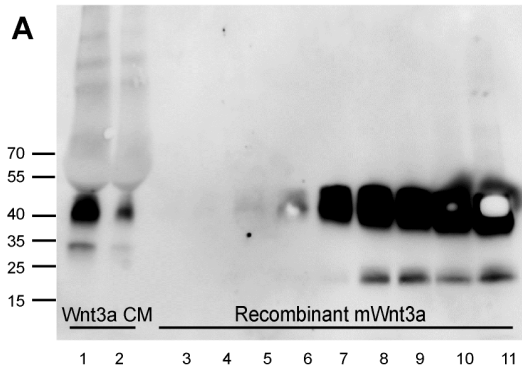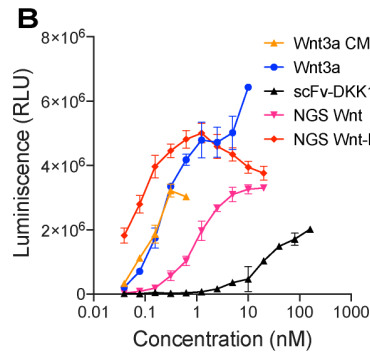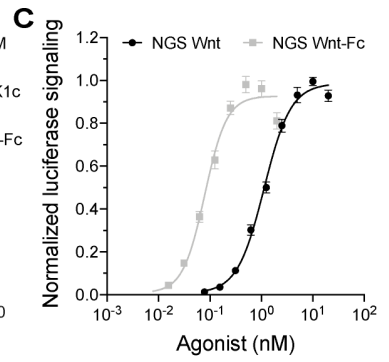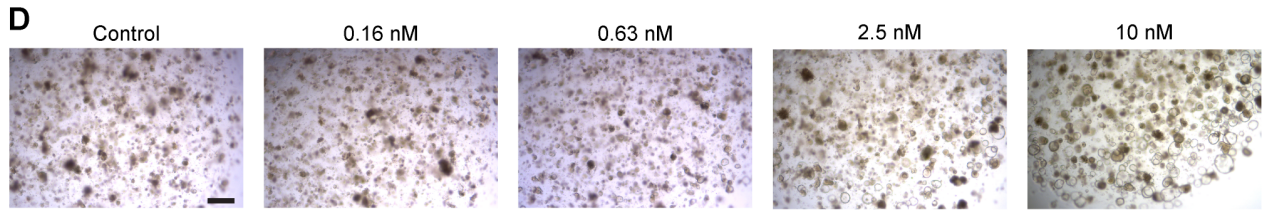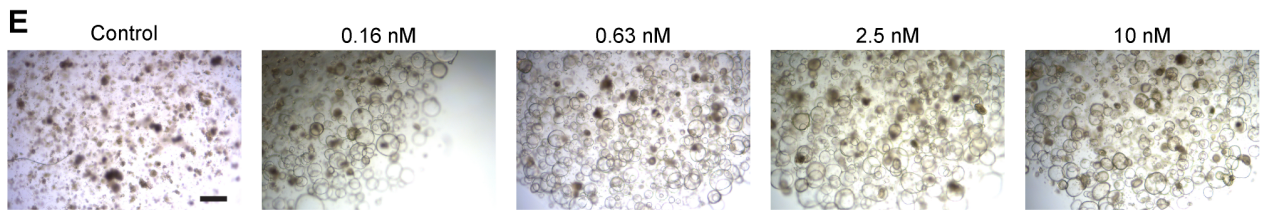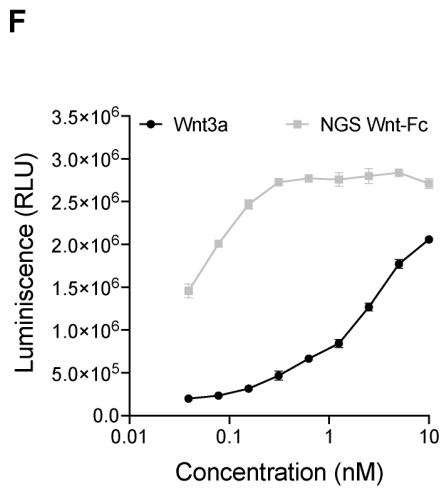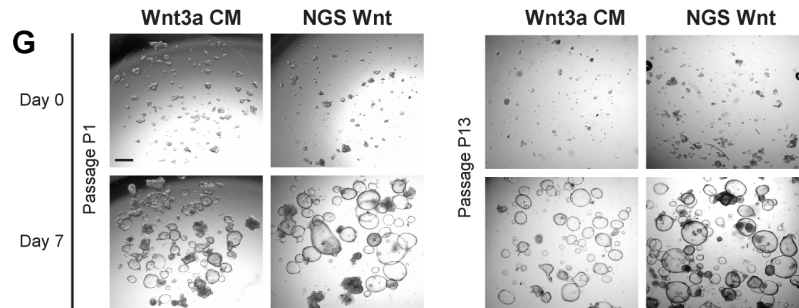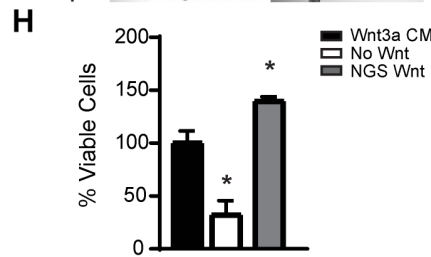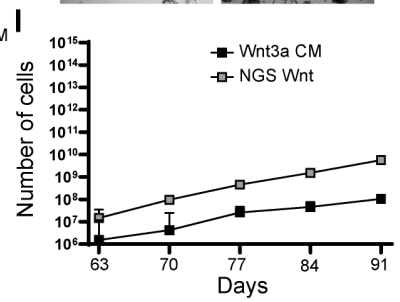

**Figure S3. Expansion of organoids using NGS Wnt, Wnt3a CM and recombinant Wnt3a.  
(Related to Figure 2)**

(A) Quantification of Wnt3a component in Wnt3a CM using Western blots. Lanes 1 to 11 correspond to 100% Wnt3a CM, 50% Wnt3aCM, 0.08 nM, 0.16 nM, 0.31 nM, 0.63 nM, 1.25 nM, 2.5 nM, 5 nM, 10 nM and 20 nM recombinant mWnt3a.

(B) Wnt reporter assays using scFv-DKK1c, Wnt3a CM, mWnt3a, NGS Wnt and Fc conjugated NGS Wnt in the presence of Rspo. Error bar represents S.E. from three technical repeats.

(C) NGS Wnt-Fc showed better  $EC_{50}$  (80 pM) compared with NGS Wnt (1.2 nM) in the presence of Rspo. Error bar represents S.E. from three technical repeats.

(D-E) Representative brightfield images of human colon organoids cultured with recombinant mWnt3a (D) or NGS Wnt-Fc (E) using indicated concentrations. Scale bars represents 500  $\mu$ m.

(F) Quantification of colon organoids cultured in mWnt3a or NGS Wnt-Fc using Cell Titer Glo assays. Error bar represents S.E. of three technical replicates.

(G) Representative brightfield images of normal human colon organoid cultures expanded for 13 passages in either Wnt3a CM (50% v/v) or NGS Wnt (0.5 nM). N=10 for normal human colon organoids. Scale bar is 100  $\mu$ m.

(H) Quantification of viable cells (as percentage) of normal human colon organoids after first passage (7 days) cultured in Wnt3a CM (black), no Wnt source (white) or NGS Wnt (grey). \* indicates  $P < 0.05$ .

(I) Expansion rates and *in vitro* growth curves of normal colon organoids were analyzed at late passages from passage P9 to P13. Graphs illustrate the number of cells counted per well at each passage. Data represent mean  $\pm$  S.D. of three independent assays. \* indicates  $P < 0.05$ .

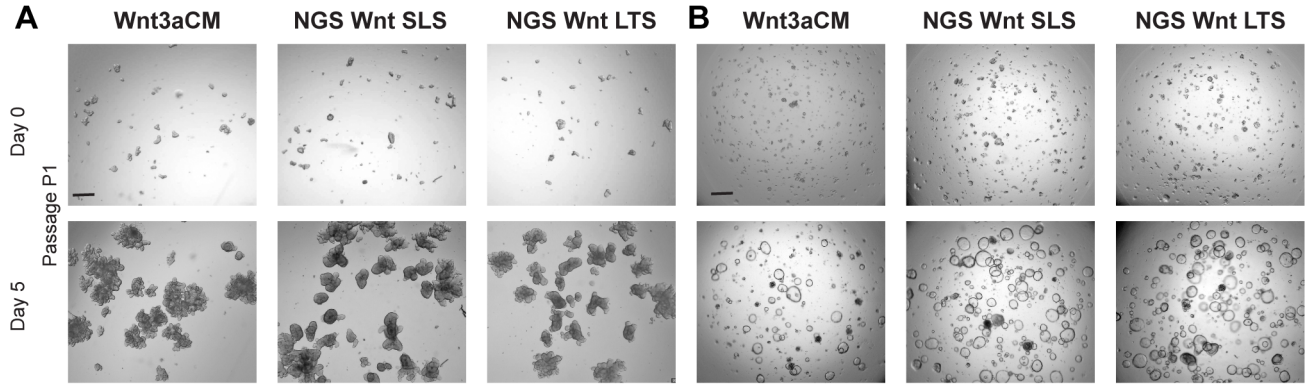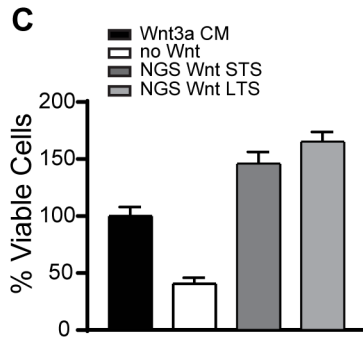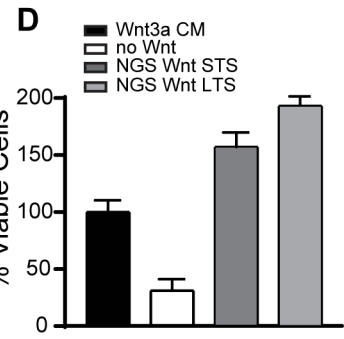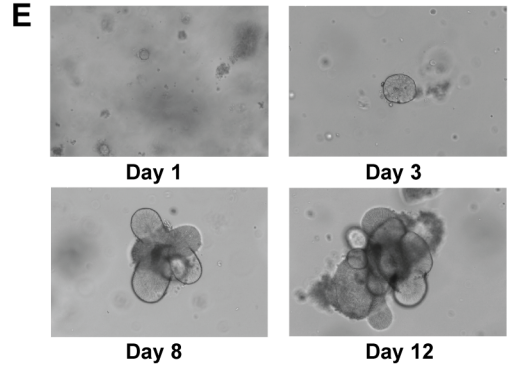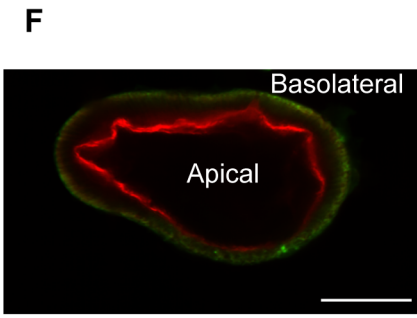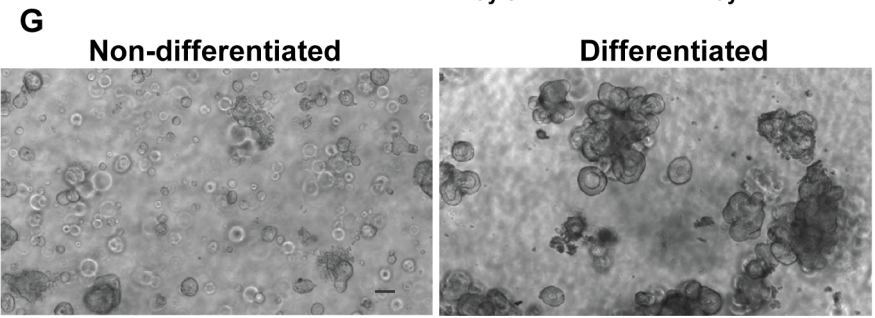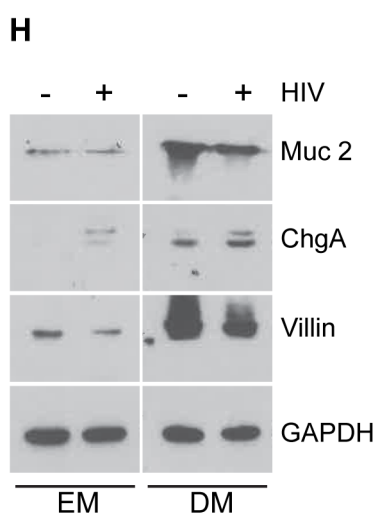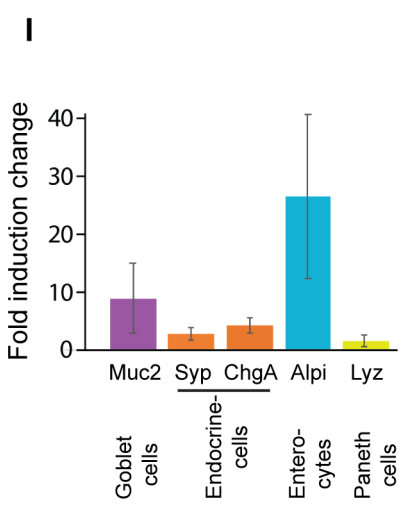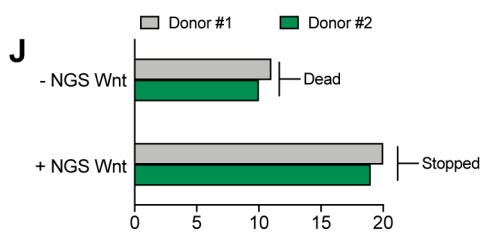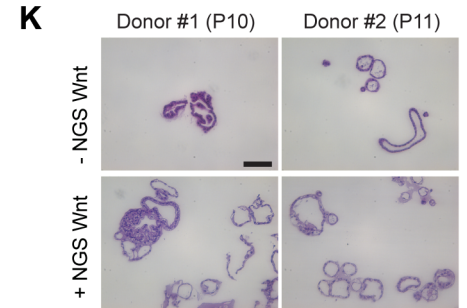

**Figure. S4 NGS Wnt supports organoid expansion and long-term maintenance (Related to Figures 2 and 3)**

(A-D) Representative brightfield images of human cystic fibrosis (A) and healthy (B) colon organoid cultures expanded for 5 days with either Wnt3aCM (50% v/v), NGS Wnt 0.5 nM STS or NGS Wnt 0.5 nM LTS. Viable cells (as percentage) of human cystic fibrosis (C) and healthy (D) colon organoid cultures after 5 days in culture were quantified. STS: short term storage (NGS Wnt stored at -80°C less than 3 months) LTS: Long term storage (NGS Wnt stored at -80°C more than a year). Scale bar is 100 µm.

(E) Representative brightfield images of human colon organoid formation from isolated crypts.

(F) Immunofluorescence images of human colon organoids, Actin (red) and E-cadherin (green). Scale bar represents 100 µm.

(G) Withdrawal of growth factors from the media redirects the stem cells (left) toward a differentiated cell state (right). Scale bar is 100 µm.

(H) Western blot analysis of non-differentiated (EM) and differentiated organoids (DM). Crypts were isolated from HIV +/- individuals and cultured in EM media containing R-spondin 1, NGS Wnt, Noggin and EGF. Withdrawals of these factors leads to an increase of differentiation markers e.g. Mucin 2 (Muc2) for goblet cells, Chromogranin A (ChgA) for endocrine cells and Villin for enterocytes. GAPDH is used as control.

(I) qRT-PCRs result of non-differentiated (EM) and differentiated organoids (DM) confirm an increase of differentiation markers in organoids cultured in DM, e.g. Mucin 2 (Muc2) for goblet cells, Chromogranin A (ChgA), Synaptophysin (Syp) for endocrine cells, intestinal alkaline phosphatase (Alpi) for enterocytes and Lysozyme 1 (Lyz) for Paneth cells. Expression levels are normalized to 18sRNA expression. Results represent mean and S.E. from N=3.

(J) Tubuloids failed to expand after 10-11 passages in the absence of NGS Wnt. In the presence of NGS Wnt, tubuloids were successfully expanded to passages 19-20 before experiments were stopped.

(K) Hematoxylin and eosin (H&E) staining of human tubuloids cultured without/with NGS Wnt. Scale bar represents 100 µm.



| Table S1. Primer sequences in qRT-PCR, related to STAR Methods. |                           |
|-----------------------------------------------------------------|---------------------------|
| Mucin 2 Forward                                                 | TGGGTGTCCTCGTCTCCTACA     |
| Mucin 2 Reverse                                                 | TGTTGCCAAACCGGTGGTA       |
| ChgA Forward                                                    | TAAAGGGGATACCGAGGTGATG    |
| ChgA Reverse                                                    | TCGGAGTGTCTCAAACATTCC     |
| Syp Forward                                                     | TGGTGTTCGGCTTCCTGAA       |
| Syp Reverse                                                     | GCGGCCAGCCTGTCT           |
| Alpi Forward                                                    | GCAACCCTGCAACCCACCCAAGGAG |
| Alpi Reverse                                                    | CCAGCATCCAGATGTCCCGGGAG   |
| Lyz Forward                                                     | TCAATAGCCGCTACTGGTGTA     |
| Lyz Reverse                                                     | ATCACGGACAACCCTCTTTGC     |
| 18s RNA Forward                                                 | GTAACCCGTTGAACCCATT       |
| 18s RNA Reverse                                                 | CCATCCAATCGGTAGTAGCG      |
